# Supplementary material for: Inkjet printing of specular holograms based on a coffee-ring effect concave structure
Source: Royal Society of Chemistry journal article supplement (doi:10.1039/c8tc01208c), 2018-01-01
Supplement: c8tc01208c2.pdf [file c8tc01208c2.pdf]

## Supporting information for: Inkjet printing of specular holograms based on coffee-ring effect concave structure

Vladislav Slabov\*, Alexandr V. Vinogradov, and Aleksandr V. Yakovlev.

*Laboratory of Solution Chemistry of Advanced Materials and Technologies, ITMO University, St. Petersburg, 197101, Russian Federation*

E-mail: slabov.vladisav@gmail.com

### 1. REFLECTIVE SPECTRA

The reflective spectra of TiO<sub>2</sub> films deposited on the surface of an uncolored PET substrate and glass were prepared using a Cary 8454 (Agilent Technologies) UV-Vis spectrophotometer with an adapted film holder. The reflective spectra of the films are shown in Figure S1.

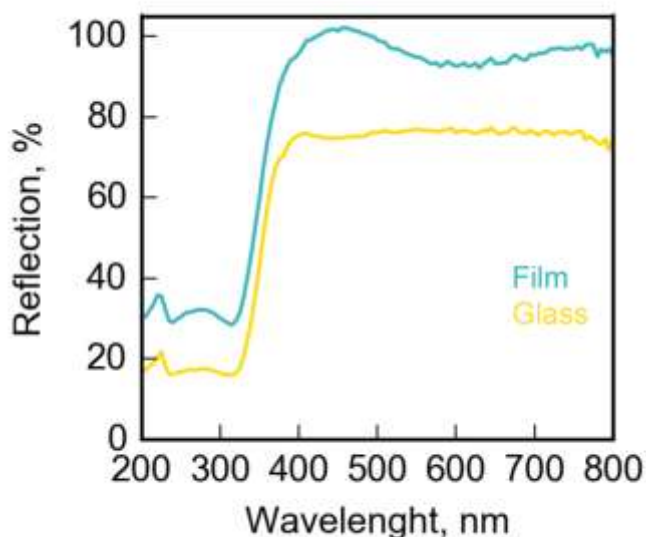

Fig. S1 - Reflective index thin films of titanium dioxide deposited on PET film and glass substrate.

## 2. DYNAMIC LIGHT SCATTERING (DLS) AGGREGATION MEASUREMENTS

The size distribution of TiO<sub>2</sub> sol and ink based on sol were prepared using a Photocor. Graph of the size distribution are shown in Figure S2.

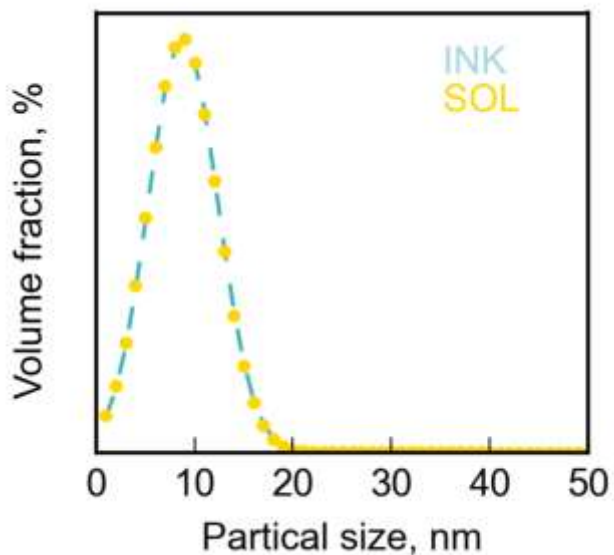

Fig. S2 – Size distribution of sol TiO<sub>2</sub> and ink based on sol.

## 3. TEM IMAGE

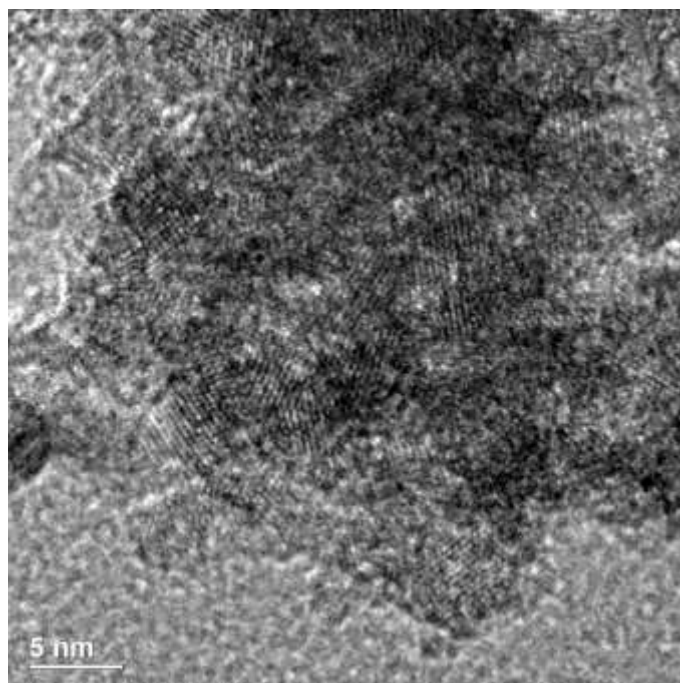

Fig. S3 - TEM image of titanium dioxide nanoparticles.

#### 4. XRD

The X-ray of TiO<sub>2</sub> powder was prepared using a Rigaku Smart Lab 3 diffractometer. The diffraction pattern of the powder is shown in Figure S4.

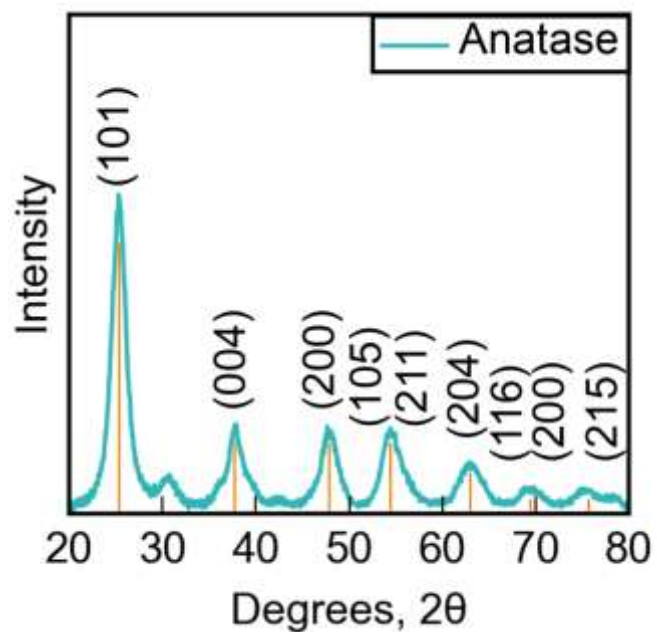

Fig. S4 - X-ray powder pattern of as synthesized TiO<sub>2</sub> nanoproducs with highlighted characteristic diffraction peak of anatase.

## 5. PRINTED SAMPLE

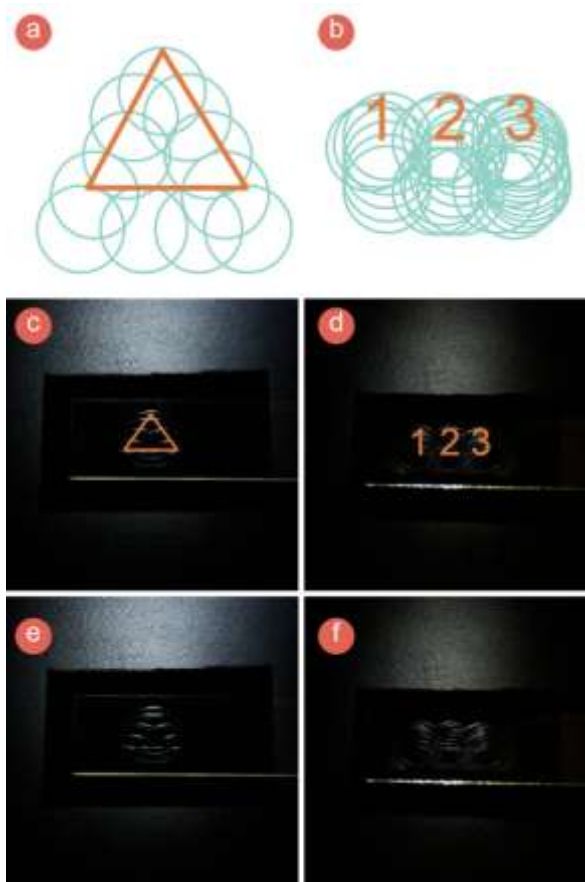

Fig. S5 – printed image. a, b – print pattern + encoded image; c, d – printed image + scheme; e, f - glare forming the coded image.

## 6. ADDITIONAL CHARACTERIZATION

The samples for transmission electron microscopy (TEM) were prepared by dispersing small amounts of samples in ethanol to form a homogeneous suspension. Photographs and video of the samples were taken by the camera Nikon D800 with lens AF-S NIKKOR 18-55 mm f\ 3.5 without using additional flash.

## 7. VIDEO LINKS

<https://youtu.be/nGrRzXkVzZY>

<https://youtu.be/p80ewWRhUCc>

<https://youtu.be/fFtNBepIK8I>
